# Supplementary material
Source: PubMed Central journal article supplement (PMC3216106)
Supplement: Supp_Data.pdf [file Supp_Data.pdf]

# Supplementary Materials for: Multiplex De Novo Sequencing of Peptide Antibiotics

Hosein Mohimani<sup>1</sup>, Wei-Ting Liu<sup>2</sup>, Yu-Liang Yang<sup>3</sup>, Susana P. Gaudêncio<sup>4</sup>, William Fenical<sup>4</sup>, Pieter C. Dorrestein<sup>2,3</sup>, and Pavel A. Pevzner<sup>5</sup>

<sup>1</sup>Department of Electrical and Computer Engineering, UC San Diego

<sup>2</sup>Department of Chemistry and Biochemistry, UC San Diego

<sup>3</sup>Skaggs School of Pharmacy and Pharmaceutical Sciences, UC San Diego

<sup>4</sup>Center for Marine Biotechnology and Biomedicine, Scripps Institution of Oceanography, UC San Diego

<sup>5</sup>Department of Computer Science and Engineering, UC San Diego ,  
Correspondence should be addressed to P.P. (ppezvner@cs.ucsd.edu).

April 4, 2011

## **Text S1. Multiplex Score.**

Let  $(S, S')$  be a spectral pair with *aligned*  $k$ -tags  $Tag = (m_1, \dots, m_k)$  and  $Tag' = (m'_1, \dots, m'_k)$ . Subtags  $m_i \dots m_j$  and  $m'_i \dots m'_j$  form a *matching subtag pair* if  $mass(m_i \dots m_j) \in S$  and  $mass(m'_i \dots m'_j) \in S'$ . The pair of masses of a matching subtag pair,  $mass(m_i \dots m_j)$  and  $mass(m'_i \dots m'_j)$ , form a *matching mass pair*. *RepeatTagPairScore* of the tag pair  $(Tag, Tag')$  is the number of matching subtag pairs, while *UniqueTagPairScore* is the number of matching mass pairs. *TagPairScore* is the average of *UniqueTagPairScore* and *RepeatTagPairScore*.

For example Consider sets  $S = \{ 72, 216, 244, 391, 405, 504, 505, 633, 796, 878, 1009, 1104 \}$  and  $S' = \{ 119, 216, 242, 244, 391, 405, 504, 522, 555, 631, 779, 796 \}$ . consisting of 12 highest intensity peaks from spectra of Tyrocidine A and A1. We illustrate how to score the tag pair  $Tag = (473, 391, 405)$  and  $Tag' = (487, 391, 405)$ , against the spectral pair  $S$  and  $S'$ .

| Compound name  | Cyclic Sequence |            |     |     |     |            |            |     |     |            | ParentMass |
|----------------|-----------------|------------|-----|-----|-----|------------|------------|-----|-----|------------|------------|
| Tyrocidine A   | Val             | Orn        | Leu | Phe | Pro | Phe        | Phe        | Asn | Gln | Tyr        | 1269       |
| Tyrocidine A1  | Val             | <b>Lys</b> | Leu | Phe | Pro | Phe        | Phe        | Asn | Gln | Tyr        | 1283       |
| Tyrocidine B   | Val             | Orn        | Leu | Phe | Pro | <b>Trp</b> | Phe        | Asn | Gln | Tyr        | 1308       |
| Tyrocidine B1  | Val             | <b>Lys</b> | Leu | Phe | Pro | <b>Trp</b> | Phe        | Asn | Gln | Tyr        | 1322       |
| Tyrocidine C   | Val             | Orn        | Leu | Phe | Pro | <b>Trp</b> | <b>Trp</b> | Asn | Gln | Tyr        | 1347       |
| Tyrocidine C1  | Val             | <b>Lys</b> | Leu | Phe | Pro | <b>Trp</b> | <b>Trp</b> | Asn | Gln | Tyr        | 1361       |
| Tyrocidine D   | Val             | Orn        | Leu | Phe | Pro | <b>Trp</b> | <b>Trp</b> | Asn | Gln | <b>Trp</b> | 1370       |
| Tyrocidine E   | Val             | Orn        | Leu | Phe | Pro | Phe        | Phe        | Asn | Gln | <b>Phe</b> | 1253       |
| Tryptocidine A | Val             | Orn        | Leu | Phe | Pro | Phe        | Phe        | Asn | Gln | <b>Trp</b> | 1292       |
| Tryptocidine B | Val             | Orn        | Leu | Phe | Pro | <b>Trp</b> | Phe        | Asn | Gln | <b>Trp</b> | 1331       |

**Table S1:** Variants of Tyrocidines. The four substitution positions relative to Tyrocidine A are shown in bold. Orn refers to the amino acid Ornithine.

Recall that, for  $Tag = (m_1, \dots, m_k)$ ,

$$Tag(s, f) = \sum_{j=s}^{f-1} m_j$$

and construct matrices for  $Tag(*, *)$  and  $Tag'(*, *)$ :

$$\begin{bmatrix} & 473 & 864 \\ \mathbf{796} & & \mathbf{391} \\ \mathbf{405} & \mathbf{878} & \end{bmatrix} \quad \begin{bmatrix} & 487 & 878 \\ \mathbf{796} & & \mathbf{391} \\ \mathbf{405} & 892 & \end{bmatrix}$$

where entries in bold in the left (right) matrix represent elements that are also present in the spectrum  $S$  ( $S'$ ), respectively. These bold elements are represented as 1s in the matrix  $M(S, Tag)$  of a spectrum  $S$  and a tag  $Tag$  as follows

$$M_{s,f} = \begin{cases} 1, & \text{if } Tag(s, f) \in S \\ 0, & \text{otherwise} \end{cases}$$

Then we have

$$M(S, Tag) = \begin{bmatrix} & 0 & 0 \\ 1 & & 1 \\ 1 & 1 & \end{bmatrix} \quad M(S', Tag') = \begin{bmatrix} & 0 & 0 \\ 1 & & 1 \\ 1 & 0 & \end{bmatrix}$$

Now *RepeatTagPairScore* is the number of ones in the elementwise product of  $M(S, Tag)$  and  $M(S', Tag')$ . In this case *RepeatTagPairScore* is 3. *UniqueTagPairScore* is also equal to 3, because none of the pairs  $(Tag(s, f), Tag'(s, f))$  is repeated. Finally, *TagPairScore* is equal to 3, the average of *UniqueTagPairScore* and *RepeatTagPairScore*.

A multitag  $\mathbf{Tag} = (Tag_1, \dots, Tag_m)$  is called an *aligned multitag* if  $Tag_j$  is aligned to  $Tag_1$  for each  $2 \leq j \leq m$ . *MultiplexScore* of an aligned  $k$ -multitag  $\mathbf{Tag} = (Tag_1, \dots, Tag_m)$  with

| mass | explanation | mass | explanation        | mass | explanation                 |
|------|-------------|------|--------------------|------|-----------------------------|
| 72   |             | 389  | FNQ                | 720  |                             |
| 73   |             | 391  | FPF, PFF           | 734  |                             |
| 74   |             | 405  | NQY                | 747  |                             |
| 90   |             | 408  | FFN                | 748  |                             |
| 114  | O, N        | 460  |                    | 751  |                             |
| 119  |             | 476  |                    | 762  |                             |
| 135  |             | 487  |                    | 765  | O ... F7, L ... N, F7 ... O |
| 148  |             | 490  |                    | 779  |                             |
| 166  |             | 504  | LFPPF, NQYV, QYVO  | 796  | P ... Y                     |
| 213  | VO          | 505  | PPFN               | 862  |                             |
| 216  |             | 507  |                    | 867  |                             |
| 225  |             | 522  |                    | 876  |                             |
| 232  |             | 535  |                    | 878  | F7 ... L, N ... F4          |
| 242  | NQ          | 538  | FPFF               | 895  | P ... V                     |
| 244  | FP,PF       | 552  | FNQY               | 990  |                             |
| 260  | LF          | 587  |                    | 992  |                             |
| 261  | FN          | 599  |                    | 1007 | O ... Q                     |
| 266  |             | 600  |                    | 1009 | P ... O                     |
| 291  | QY          | 615  |                    | 1025 | F5 ... L, F6 ... F4         |
| 294  | FF          | 616  |                    | 1039 |                             |
| 334  |             | 618  | O ... F6, N ... O  | 1056 | L ... Y                     |
| 342  |             | 633  | P ... Q            | 1104 |                             |
| 357  | LFP         | 650  |                    | 1122 | P ... L, F7 ... P, N ... F6 |
| 371  |             | 651  | L ... F7, F7 ... V | 1155 | L ... V, Q ... F7           |
| 388  |             | 654  |                    | 1170 | O ... Y                     |

**Table S2:** MALDI-TOF spectrum of Tyrocidine A represented as a set of integer masses. For masses that appear in the theoretical spectrum, the sequence of the corresponding subpeptide is shown. 31 out of 75 masses in the experimental spectrum appear in theoretical spectra. 45 out of 90 (possibly repeating) masses in the theoretical spectrum appear in the experimental spectrum. The three phenylalanines in VOLFPFNQY are shown by F4, F6 and F7 to avoid confusion. O ... F6 is a shorthand for OLFPPF subpeptide. For the details of transforming the experimental spectrum into the set of integer masses see **Results Section**.

| 2-tag                             | 3-tag                               | 4-tag                   | 5-tag                        |
|-----------------------------------|-------------------------------------|-------------------------|------------------------------|
| (504, 765) =>                     | (244, 260, 765) =>                  | (244, 260, 230, 535) => | (244, 260, 230, 388, 147) => |
| (114, 1155) =>                    | (114, 260, 895) =>                  | (114, 260, 504, 391) => | (114, 260, 213, 291, 391) => |
| (504, 765) =>                     | (244, 260, 765) =>                  | (244, 260, 618, 147) => | (244, 260, 230, 388, 147) => |
| 6-tag                             | 7-tag                               | rank of 7-tag           |                              |
| (244, 260, 111, 119, 388, 147) => | (244, 260, 111, 119, 274, 114, 147) | 1                       |                              |
| (114, 260, 213, 291, 244, 147) => | (114, 260, 133, 80, 291, 244, 147)  | 2                       |                              |
| (244, 260, 111, 119, 388, 147) => | (244, 260, 111, 119, 175, 213, 147) | 3                       |                              |

**Table S3:** Evolution of the three top score tags of Tyrocidine A, constructed by individual sequencing algorithm.

| Tyc A |       |            | Tyc B |       |            | Tyc C |       |            |
|-------|-------|------------|-------|-------|------------|-------|-------|------------|
| mass  | score | fragment   | mass  | score | fragment   | mass  | score | fragment   |
| 473   | 1     | VOLF       | 213   | 1     | VO         | 756   | 1     | VOLFPW     |
| 717   | 0.98  | VOLFPP     | 473   | 0.98  | VOLF       | 99    | 0.94  | V          |
| 864   | 0.94  | VOLFPPF    | 99    | 0.96  | V          | 213   | 0.86  | VO         |
| 213   | 0.66  | VO         | 1308  | 0.82  | ParentMass | 473   | 0.78  | VOLF       |
| 1269  | 0.50  | ParentMass | 903   | 0.80  | VOLFPWF    | 1347  | 0.76  | ParentMass |
| 102   | 0.42  |            | 1050  | 0.52  |            | 1056  | 0.60  | VOLFPWWN   |
| 978   | 0.40  | VOLFPPFN   | 620   | 0.36  |            | 942   | 0.40  | VOLFPWW    |
| 1124  | 0.34  |            | 717   | 0.20  |            | 1186  | 0.20  |            |
| 1238  | 0.24  |            | 756   | 0.16  | VOLFPW     | 1184  | 0.14  | VOLFPWWNQ  |
| 374   | 0.20  |            | 1145  | 0.14  | VOLFPWFNQ  | 501   | 0.08  |            |
| 1106  | 0.16  | VOLFPPFNQ  | 1017  | 0.10  | VOLFPWFN   | 682   | 0.08  |            |
| 1252  | 0.16  |            | 773   | 0.08  |            | 903   | 0.08  |            |
| 231   | 0.08  |            | 790   | 0.08  |            | 914   | 0.08  |            |
| 1008  | 0.16  |            | 1119  | 0.06  |            | 1039  | 0.08  |            |

**Table S4:** Spectral profiles for 200 highest-scoring 7-tags of Tyrocidines A, B and C with amino acids sequences VOLFPFFNQY, VOLFPWFNQY, and VOLFPWWNQY, correspondingly. Only 14 masses with the highest values of spectral profiles are shown.

| Tyc A tag |     |    |     |     |     |     | Score | Tyc A1 tag |            |            |            |            |            |            | Score | PS   |
|-----------|-----|----|-----|-----|-----|-----|-------|------------|------------|------------|------------|------------|------------|------------|-------|------|
|           |     |    |     |     |     |     |       | <b>227</b> | 260        | 97         | 147        | 147        | 114        | 291        | 21    | 22.5 |
|           |     |    |     |     |     |     |       | 213        | <b>274</b> | 97         | 147        | 147        | 114        | 291        | 18    | 21   |
|           |     |    |     |     |     |     |       | 213        | 260        | <b>113</b> | 147        | 147        | 114        | 291        | 16    | 20   |
| 213       | 260 | 97 | 147 | 147 | 114 | 291 | 24    | 213        | 260        | 97         | <b>161</b> | 147        | 114        | 291        | 14    | 19   |
|           |     |    |     |     |     |     |       | 213        | 260        | 97         | 147        | <b>161</b> | 114        | 291        | 12    | 18   |
|           |     |    |     |     |     |     |       | 213        | 260        | 97         | 147        | 147        | <b>128</b> | 291        | 14    | 19   |
|           |     |    |     |     |     |     |       | 213        | 260        | 97         | 147        | 147        | 114        | <b>305</b> | 17    | 20.5 |

**Table S5:** Illustration of the pairwise score for  $Tag = (213, 260, 97, 147, 147, 114, 291)$  and spectra  $S$  and  $S'$  of Tyc A/A1 spectral pair. The substitution residues in seven correspondig tags for  $Tag$  are shown in bold.  $PS$  stands for  $PairwiseScore(Tag, S, S')$ .

| Peptide $P$ | Peptide $P'$ | $MXS(S)$ | $MXS(S')$ | $MXPS(S, S')$ | $MXPS(S', S)$ | $\Delta(S, S')$ | # $(S, S')$ -shared |
|-------------|--------------|----------|-----------|---------------|---------------|-----------------|---------------------|
| Tyc A       | Tyc A1       | 28       | 23        | 24            | 24            | 3               | 57                  |
| Tyc B       | Tyc B1       | 26       | 27        | 25            | 25            | 3               | 66                  |
| Tyc C       | Tyc C1       | 24       | 23        | 22.5          | 22.5          | 2               | 63                  |
| Tyc A       | Tyc B        | 28       | 26        | 24.5          | 24.5          | 5               | 57                  |
| Tyc A1      | Tyc B1       | 23       | 27        | 23.5          | 24            | 2.5             | 54                  |
| Tyc B       | Tyc C        | 26       | 24        | 23.5          | 22.5          | 3               | 66                  |
| Tyc B1      | Tyc C1       | 27       | 23        | 23.5          | 24            | 2.5             | 59                  |
| Tyc A       | Tyc C        | 28       | 24        | 21            | 22.5          | 8.5             | 48                  |
| Tyc A1      | Tyc C1       | 23       | 23        | 22            | 21.5          | 2.5             | 43                  |
| Tyc A       | Tyc B1       | 28       | 27        | 23.5          | 23.5          | 8               | 32                  |
| Tyc A1      | Tyc B        | 23       | 26        | 21            | 20.5          | 7.5             | 29                  |
| Tyc A       | Tyc C1       | 28       | 23        | 20            | 20.5          | 10.5            | 26                  |
| Tyc A1      | Tyc C        | 23       | 24        | 19            | 20            | 8               | 24                  |
| Tyc B       | Tyc C1       | 26       | 23        | 19            | 20            | 10              | 31                  |
| Tyc B1      | Tyc C        | 27       | 24        | 22            | 22            | 7               | 35                  |

**Table S6:** Identification of putative spectral pairs  $S/S'$  in Tyrocidine family (spectra that represent peptides  $P/P'$  differing by a single amino acid). Peptides in the first seven pairs differ from each other by a single substitution, while peptides in the remaining 8 pairs differ from each other by multiple substitutions.  $MXS$  and  $MXPS$  stand for *MaxScore* and *MaxPairwiseScore*. The average  $\Delta$  is 3 and 7.75 for the first 7 peptide pairs and the last 8 peptide pairs, correspondingly. The number of shared peaks,  $|S \cap S'|$ , plus the number of  $\delta$ -shared peaks,  $|S \cap (S' - \delta)|$ , are also shown, where  $\delta$  is the difference between parent masses of  $S$  and  $S'$ . The average number of such  $(S, S')$ -shared peaks on first seven peptide pairs is 60.2 and 33.5 for the last eight peptide pairs.

| Tyc A tag |     |     |     |     |     |     |           | $Score$   | $PS$ | Tyc A1 tag |     |     |     |     |     |           |           | $Score$ | $PS$ |
|-----------|-----|-----|-----|-----|-----|-----|-----------|-----------|------|------------|-----|-----|-----|-----|-----|-----------|-----------|---------|------|
| 111       | 119 | 243 | 128 | 260 | 244 | 161 | <b>28</b> | <b>23</b> | 100  | 147        | 243 | 128 | 260 | 244 | 161 | <b>23</b> | 17.5      |         |      |
| 111       | 119 | 175 | 213 | 147 | 244 | 260 | 27        | <b>23</b> | 100  | 144        | 261 | 147 | 243 | 128 | 260 | <b>23</b> | 17.5      |         |      |
| 111       | 119 | 388 | 147 | 130 | 114 | 260 | 27        | 21        | 97   | 147        | 260 | 128 | 262 | 225 | 164 | <b>23</b> | <b>18</b> |         |      |
| 102       | 111 | 119 | 388 | 147 | 244 | 158 | 27        | 20.5      | 99   | 128        | 260 | 244 | 261 | 147 | 144 | 22        | <b>18</b> |         |      |
| 80        | 133 | 114 | 260 | 147 | 244 | 291 | 27        | <b>23</b> | 98   | 147        | 243 | 128 | 260 | 244 | 163 | 22        | 16        |         |      |

$$\Delta(S, S', TagList, TagList') = MaxScore(TagList, S) + MaxScore(TagList', S') - MaxPairwiseScore(TagList, S, S') - MaxPairwiseScore(TagList', S, S') = 28 + 23 - 23 - 18 = 10$$

**Table S7:** Illustration of maximum score, maximum pairwise score, and  $\Delta$  distance for a list of five top scoring tags of individual sequencing of Tyc A and Tyc A1.  $PS$  stands for *PairwiseScore*.

respect to spectra  $\mathbf{S} = (S_1, \dots, S_m)$  and spectral network  $G$  is defined as:

$$\text{MultiplexScore}(\mathbf{Tag}, \mathbf{S}, G) = \sum_{(j,r) \in E(G)} \text{TagPairScore}(\text{Tag}_j, \text{Tag}_r, S_j, S_r)$$

where  $E(G)$  is the set of edges of the spectral network  $G$ .

### Text S2. Adaptive Spectral Network.

The described multiplex sequencing algorithm assumes that the spectral network was constructed before multiplex sequencing started. Below we introduce a different approach based on an adaptive construction of the spectral network in each step of the multiplex sequencing algorithm. To score  $(k+1)$ -tags, the algorithm uses the best estimation of the spectral network from the highest scoring  $k$ -tags.

At every step we consider a complete graph on all spectra (with edges connecting all pairs of spectra). We define a non-negative *weight function*  $w(j, r)$  on all pairs of spectra  $S_j$  and  $S_r$  from the set of spectra  $\mathbf{S} = (S_1, \dots, S_m)$  and further require that the total weights of all pairs equals to 1:  $\sum_{1 \leq j < r \leq m} w(j, r) = 1$ . Define the *weighted multiplex score* of a multitag  $\mathbf{Tag} = (\text{Tag}_1, \dots, \text{Tag}_m)$ , with respect to spectra  $\mathbf{S}$  and weighting  $w$ , as

$$\begin{aligned} \text{MultiplexScore}_w(\mathbf{Tag}, \mathbf{S}) \\ = \sum_{(j,r) \in E(K_m)} w(j, r) \cdot \text{TagPairScore}(\text{Tag}_j, \text{Tag}_r, S_j, S_r) \end{aligned}$$

One can see that there is a relationship between *MultiplexScore* defined in the main text (for a spectral network  $G$ ) and *MultiplexScore<sub>w</sub>* defined here. In fact, by defining

$$w_G(e) = \begin{cases} 1/|E(G)|, & e \in E(G) \\ 0, & \text{otherwise} \end{cases}$$

the weighted multiplex score of a multitag with respect to weighting  $w_G$  is equal to its multiplex score with respect to spectral network  $G$  divided by  $|E(G)|$ .

Now for a  $k$ -tag  $\text{Tag}$  of spectrum  $S_u$ , define

$$\text{MultiplexScore}_w(\text{Tag}, u, \mathbf{S}) = \text{MultiplexScore}_w(\mathbf{multitag}(\text{Tag}, u, \mathbf{S}, K_m), \mathbf{S})$$

We start with a uniform weighting on all edges of complete graph with  $w(j, r) = \frac{2}{m \cdot (m-1)}$ . Similar to previous sections, the algorithm tries to find high scoring tags by using weighted multiplex score. However, after finding high score  $k$ -tags for each  $k$ , it updates the weighting  $w$  as follows. Let  $\mathbf{Tag}_1 \dots \mathbf{Tag}_t$  be the multitags returned by the algorithm at step  $k$ , where  $\mathbf{Tag}_l = (\text{Tag}_l^1, \dots, \text{Tag}_l^m)$ . For each pair of vertices  $(j, r)$ , we define

$$\text{CorrespondenceCount}(j, r) = \#\{l \mid \text{Tag}_l^j \text{ and } \text{Tag}_l^r \text{ are corresponding}\}$$

Then we update weights as follows:

$$w(e) = \frac{\text{CorrespondenceCount}(j, r)}{\sum_{1 \leq j < r \leq m} \text{CorrespondenceCount}(j, r)}$$

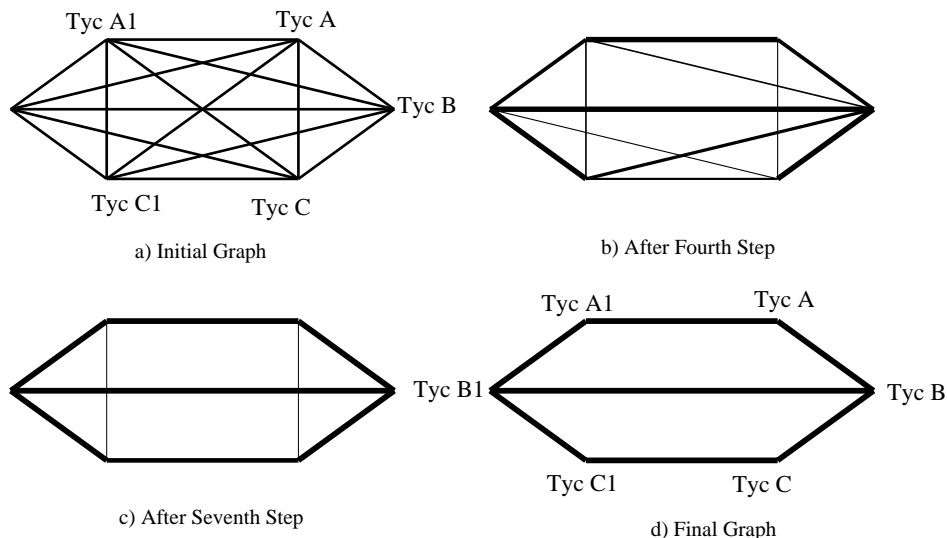

**Fig. S1:** Weighting of the spectral network of the Tyrocidine family at different stages of the algorithm. The width of each edge is proportional to its weight (edges with weight zero are not shown). Spectral Networks are shown at (a) the initial step ( $k = 2$ ) with uniform weights on all edges, (b)  $k = 4$ , (c)  $k = 7$ , and (d) the final step ( $k = 10$ ).

and use new weights for scoring  $(k + 1)$ -tags.

The four highest scoring  $k$ -tags of Tyrocidine family reconstructed with weighted multiplex sequencing are the same four highest scoring tags reconstructed by multiplex sequencing (see **Table 1 (c)**). The scores, however, are different. WMS column of **Table 1 (c)** shows weighted multiplex scores of these tags.

**Figure S1** shows how the spectral network improves with each iteration and finally reveals all spectral pairs as edges with positive weights.

### **Text S3. Multiplex sequencing of unknown variants of Tyrocidines.**

We construct the spectral network for spectra of Tyrocidines, connecting spectra  $S$  and  $S'$  by an edge if the number of  $(S, S')$ -shared peaks is greater than a threshold (using  $\Delta$ -scores results in similar spectral networks). Recall that  $\#(S, S')$ -shared peaks is equal to the number of shared peaks,  $|S \cap S'|$ , plus the number of  $\delta$ -shared peaks,  $|S \cap (S' - \delta)|$ , where  $\delta$  is the difference between parent masses of  $S$  and  $S'$ . The resulting spectral network is very complex reflecting the complexity of crude microbial extracts. We therefore choose a very stringent threshold (at least 60  $(S, S')$ -shared peaks) to construct edges in the corresponding spectral network and focus our attention on the connected component of the spectral network that contains known Tyrocidines. Such stringent threshold (see **Table S10**) is chosen to ensure that all spectra in this component represent members of the Tyrocidine family (some of them may represent chemical adducts). **Figure S2** reveals a spectral network of 41 spectra that contains spectra of both known and unknown tyrocidines. However, some vertices in this spectral network correspond to very similar spectra (with parent masses differing by 1-2 Da) that most likely

|     | Rank | Tag |     |     |     |     |     |     |     |
|-----|------|-----|-----|-----|-----|-----|-----|-----|-----|
| (a) | 1    | 99  | 127 | 139 | 268 | 193 | 101 | 115 |     |
|     | 2    | 99  | 127 | 139 | 93  | 193 | 175 | 216 |     |
|     | 3    | 99  | 127 | 139 | 75  | 193 | 193 | 216 |     |
|     | Rank | Tag |     |     |     |     |     |     |     |
| (b) | 1    | 71  | 113 | 113 | 128 | 113 | 147 | 113 | 113 |
|     | 2    | 71  | 113 | 128 | 113 | 113 | 147 | 113 | 113 |
|     | 3    | 71  | 113 | 113 | 128 | 113 | 113 | 147 | 113 |

**Table S8:** (a) Top three multiplex sequencing reconstructions of spectra of Cyclomarin A, Cyclomarin C, Dehydro Cyclomarin A and Dehydro Cyclomarin C (projected on Cyclomarin A). (b) Top three multiplex sequencing reconstructions of MALDI-TOF spectra of Reginamides (projected on Reginamide A). Exactly the same results can be achieved by multiplex sequencing of ten ESI-IT spectra of variants of Reginamide with masses 897, 911 (Reginamide A), 925, 939, 953, 967, 981, 995, 1009, 1023.

| Sequence |     |     |     |     |     |     |     | Score |
|----------|-----|-----|-----|-----|-----|-----|-----|-------|
| 71       | 113 | 113 | 128 | 113 | 147 | 113 | 113 | 35.3  |
| 71       | 113 | 113 | 128 | 113 | 113 | 147 | 113 | 35.0  |
| 71       | 113 | 128 | 113 | 147 | 113 | 113 | 113 | 33.0  |
| 71       | 113 | 113 | 128 | 147 | 113 | 113 | 113 | 32.7  |
| 71       | 113 | 113 | 113 | 128 | 147 | 113 | 113 | 32.3  |
| 71       | 113 | 113 | 113 | 128 | 113 | 147 | 113 | 32.3  |
| 71       | 113 | 113 | 113 | 128 | 113 | 113 | 147 | 32.3  |
| 71       | 128 | 113 | 113 | 113 | 147 | 113 | 113 | 31.7  |
| 71       | 113 | 113 | 128 | 113 | 113 | 113 | 147 | 31.7  |
| 71       | 128 | 113 | 113 | 147 | 113 | 113 | 113 | 31.3  |
| 71       | 113 | 128 | 113 | 113 | 113 | 147 | 113 | 31.0  |
| 71       | 113 | 113 | 113 | 113 | 128 | 113 | 147 | 28.0  |
| 71       | 128 | 113 | 113 | 113 | 113 | 147 | 113 | 27.0  |
| 71       | 113 | 113 | 113 | 113 | 128 | 147 | 113 | 26.7  |
| 71       | 113 | 128 | 113 | 113 | 113 | 113 | 147 | 26.3  |
| 71       | 128 | 113 | 147 | 113 | 113 | 113 | 113 | 26.0  |
| 71       | 113 | 128 | 147 | 113 | 113 | 113 | 113 | 25.0  |
| 71       | 128 | 113 | 113 | 113 | 113 | 113 | 147 | 24.0  |
| 71       | 128 | 147 | 113 | 113 | 113 | 113 | 113 | 23.7  |
| 71       | 113 | 113 | 113 | 113 | 113 | 128 | 147 | 23.0  |

**Table S9:** All possible sequences of masses formed by 113 (with multiplicity 5), 71, 128, and 147, along with their multiplex score against the Reginamide A spectrum. The three top scoring peptides are the same as the three top peptides returned by the multiplex sequencing algorithm.



| Peptide $P$ | Peptide $P'$ | # $(S, S')$ -shared peaks |
|-------------|--------------|---------------------------|
| Tyc A       | Tyc A1       | 72                        |
| Tyc B       | Tyc B1       | 68                        |
| Tyc C       | Tyc C1       | 72                        |
| Tyc A       | Tyc B        | 60                        |
| Tyc A1      | Tyc B1       | 59                        |
| Tyc B       | Tyc C        | 61                        |
| Tyc B1      | Tyc C1       | 58                        |
| Tyc A       | Tyc C        | 61                        |
| Tyc A1      | Tyc C1       | 59                        |
| Tyc A       | Tyc B1       | 32                        |
| Tyc A1      | Tyc B        | 32                        |
| Tyc A       | Tyc C1       | 29                        |
| Tyc A1      | Tyc C        | 36                        |
| Tyc B       | Tyc C1       | 32                        |
| Tyc B1      | Tyc C        | 34                        |

**Table S10:** Number of shared peaks of Tyrocidines (analogous of **Table S7** for data-dependent Ion Trap spectra).

represent isotopic variants or artifacts caused by parent mass errors. We therefore cluster similar spectra (with close parent masses) and represent them as a single vertex in the spectral network. **Figure S3** shows the resulting spectral network and reveals 13 distinct tyrocidine-like peptides.

Since the spectra in this network corresponding to Tyrocidine A, A1, B, B1, C and C1 are well established, we dereplicate [6] the remaining 7 spectra from these 6 spectra using the **multitag** function described in **Figure 3**. The only difference is that, instead of a single input sequence, we input the sequence of all six Tyrocidines A, A1, B, B1, C and C1, and **multitag** algorithm choose the highest scoring possible dereplication for all the other variants. **Table S11** shows the dereplicated peptides (compare with known tyrocidines shown in **Table S12**). Among 5 parents masses that are shared between our results and previous results, in four cases our dereplication matches previously known sequence, and in one case we have a different sequence, probably due to poor fragmentation. In fact, we see peptides with masses 1292, 1331, 1345, 1370 and 1384, which are known to be result of the substitution of Tyrosine by Tryptophan in tenth residue of Tyrocidine A, B, B1, C and C1. We can observe an additional mass, 1306, which is probably result of substitution of Tyrosine by Tryptophan in Tyrocidine A1. However, our current derpelication does not confirm this.

#### **Text S4. Multiplex sequencing of Reginamides.**

Similar to Tyrocidines, we construct the spectral network of Reginamides and sequenced the candidate peptides by dereplication. The results are shown in **Figure S4**, **Figure S5** and **Table S13**.

**Table S9** shows multiplex score of all sequences formed by five 113 residues, 71, 147 and 128 residues. The three top scoring sequences in this table are the same as the three top scoring sequences returned by multiplex sequencing, which confrims the correct reconstruction of order

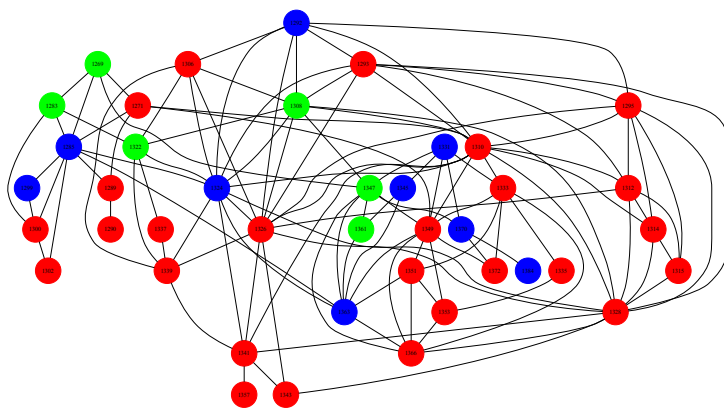

**Fig. S2:** The spectral network of Tyrocidine family, where two spectra are connected if  $\#(S, S')$ -shared peaks is greater than 60 (each spectrum contains 75 peaks). Green nodes are Tyrocidine A, A1, B, B1, C and C1. Blue nodes are other known variants of tyrocidines. Red nodes stand for candidate variants of Tyrocidines that are not yet reported in the literature. Some of these masses might stand for adducts.

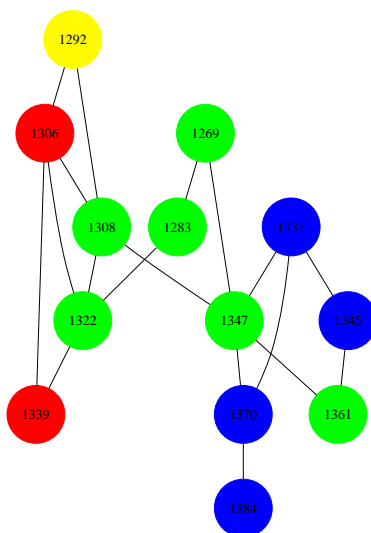

(a)

**Fig. S3:** The spectral network of Tyrocidine family after clustering similar spectra. The sequences are predicted in **Table S11** using the function **multitag** described in **Figure 3**, and sequence of tyrocidines A, A1, B, B1, C and C1 (green nodes) as the inputs. For four of the spectra, predicted sequence matches the previous works (blue nodes). For one of the spectra, the parents mass matches, but the sequence is different from previous works, possibly due to poor fragmentation (yellow node). We also have two spectra, with masses that are not reported previously to our best knowledge (red nodes).

| PM   | Tag |     |     |     |    |     |     |     |     |     | Score | Comment                    |
|------|-----|-----|-----|-----|----|-----|-----|-----|-----|-----|-------|----------------------------|
| 1269 | 99  | 114 | 113 | 147 | 97 | 147 | 147 | 114 | 128 | 163 | 21    | Tyrocidine A               |
| 1283 | 99  | 128 | 113 | 147 | 97 | 147 | 147 | 114 | 128 | 163 | 26    | Tyrocidine A1              |
| 1291 | 99  | 114 | 113 | 147 | 97 | 186 | 147 | 97  | 128 | 163 | 18    | New                        |
| 1292 | 99  | 114 | 113 | 147 | 97 | 186 | 131 | 114 | 128 | 163 | 22    | PM matches Tyrocidine A[1] |
| 1306 | 99  | 128 | 113 | 147 | 97 | 186 | 147 | 114 | 112 | 163 | 23    | New                        |
| 1308 | 99  | 114 | 113 | 147 | 97 | 186 | 147 | 114 | 128 | 163 | 25    | Tyrocidine B               |
| 1322 | 99  | 128 | 113 | 147 | 97 | 186 | 147 | 114 | 128 | 163 | 32    | Tyrocidine B1              |
| 1331 | 99  | 114 | 113 | 147 | 97 | 186 | 147 | 114 | 128 | 186 | 24    | Tryptocidine B[1]          |
| 1345 | 99  | 128 | 113 | 147 | 97 | 186 | 147 | 114 | 128 | 186 | 27    | previously reported[1]     |
| 1347 | 99  | 114 | 113 | 147 | 97 | 186 | 186 | 114 | 128 | 163 | 24    | Tyrocidine C               |
| 1361 | 99  | 128 | 113 | 147 | 97 | 186 | 186 | 114 | 128 | 163 | 30    | Tyrocidine C1              |
| 1370 | 99  | 114 | 113 | 147 | 97 | 186 | 186 | 114 | 128 | 186 | 26    | Tyrocidine D[1]            |
| 1384 | 99  | 128 | 113 | 147 | 97 | 186 | 186 | 114 | 128 | 186 | 24    | previously reported[1]     |

**Table S11:** Reconstructed peptides from the spectra corresponding to vertices in the spectral network shown in **Figure S3**. The spectra were dereplicated using (known) Tyrocidines A, A1, B, B1, C and C1 by applying the **multitag** algorithm described in **Figure 3**. Four of the sequences are reported previously (see **Table S12**). For one spectrum with previously reported parent mass, 1292 Da, our reconstruction slightly differs from that of [1].

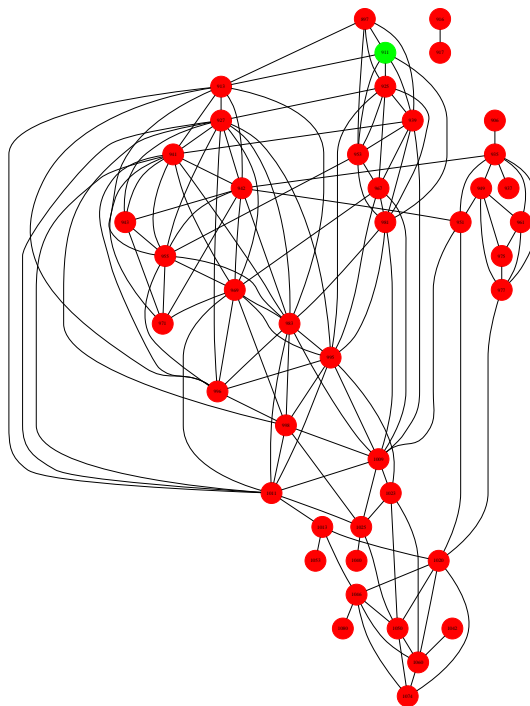

**Fig. S4:** The spectral network of Reginamides, where two spectra are connected if  $\#(S, S')$ -shared peaks is greater than 25 (each spectra consists of 40 peaks.) Green node is Reginamide A. Some of the nodes may represent chemical adducts.

| Parent Mass | Tag       |            |            |            |           |            |            |            |            |            |
|-------------|-----------|------------|------------|------------|-----------|------------|------------|------------|------------|------------|
| 1237        | 99        | 114        | 113        | 147        | 97        | 115        | 147        | 114        | 128        | 163        |
| 1251        | 99        | 128        | 113        | 147        | 97        | 115        | 147        | 114        | 128        | 163        |
| 1253        | 99        | 114        | 113        | 147        | 97        | 147        | 147        | 114        | 128        | 147        |
| <b>1269</b> | <b>99</b> | <b>114</b> | <b>113</b> | <b>147</b> | <b>97</b> | <b>147</b> | <b>147</b> | <b>114</b> | <b>128</b> | <b>163</b> |
| <b>1283</b> | <b>99</b> | <b>128</b> | <b>113</b> | <b>147</b> | <b>97</b> | <b>147</b> | <b>147</b> | <b>114</b> | <b>128</b> | <b>163</b> |
| 1285        | 99        | 114        | 113        | 147        | 97        | 147        | 163        | 114        | 128        | 163        |
| 1285        | 99        | 114        | 113        | 147        | 97        | 163        | 147        | 114        | 128        | 163        |
| <b>1292</b> | 99        | 114        | 113        | 147        | 97        | 147        | 147        | 114        | 128        | 186        |
| 1292        | 99        | 114        | 113        | 147        | 97        | 186        | 147        | 114        | 128        | 147        |
| 1299        | 99        | 128        | 113        | 147        | 97        | 163        | 147        | 114        | 128        | 163        |
| 1299        | 99        | 128        | 113        | 147        | 97        | 147        | 163        | 114        | 128        | 163        |
| 1308        | 99        | 114        | 113        | 147        | 97        | 147        | 186        | 114        | 128        | 163        |
| <b>1308</b> | <b>99</b> | <b>114</b> | <b>113</b> | <b>147</b> | <b>97</b> | <b>186</b> | <b>147</b> | <b>114</b> | <b>128</b> | <b>163</b> |
| 1322        | 99        | 128        | 113        | 147        | 97        | 147        | 186        | 114        | 128        | 163        |
| <b>1322</b> | <b>99</b> | <b>128</b> | <b>113</b> | <b>147</b> | <b>97</b> | <b>186</b> | <b>147</b> | <b>114</b> | <b>128</b> | <b>163</b> |
| 1324        | 115       | 114        | 113        | 147        | 97        | 186        | 147        | 114        | 128        | 163        |
| 1324        | 99        | 114        | 113        | 147        | 97        | 163        | 186        | 114        | 128        | 163        |
| <b>1331</b> | <b>99</b> | <b>114</b> | <b>113</b> | <b>147</b> | <b>97</b> | <b>186</b> | <b>147</b> | <b>114</b> | <b>128</b> | <b>186</b> |
| 1336        | 99        | 114        | 113        | 147        | 97        | 147        | 214        | 114        | 128        | 163        |
| 1338        | 115       | 128        | 113        | 147        | 97        | 186        | 147        | 114        | 128        | 163        |
| 1338        | 99        | 128        | 113        | 147        | 97        | 163        | 186        | 114        | 128        | 163        |
| <b>1345</b> | <b>99</b> | <b>128</b> | <b>113</b> | <b>147</b> | <b>97</b> | <b>186</b> | <b>147</b> | <b>114</b> | <b>128</b> | <b>186</b> |
| <b>1347</b> | <b>99</b> | <b>114</b> | <b>113</b> | <b>147</b> | <b>97</b> | <b>186</b> | <b>186</b> | <b>114</b> | <b>128</b> | <b>163</b> |
| 1350        | 99        | 128        | 113        | 147        | 97        | 147        | 214        | 114        | 128        | 163        |
| <b>1361</b> | <b>99</b> | <b>128</b> | <b>113</b> | <b>147</b> | <b>97</b> | <b>186</b> | <b>186</b> | <b>114</b> | <b>128</b> | <b>163</b> |
| 1363        | 99        | 114        | 113        | 163        | 97        | 186        | 186        | 114        | 128        | 163        |
| <b>1370</b> | <b>99</b> | <b>114</b> | <b>113</b> | <b>147</b> | <b>97</b> | <b>186</b> | <b>186</b> | <b>114</b> | <b>128</b> | <b>186</b> |
| <b>1384</b> | <b>99</b> | <b>128</b> | <b>113</b> | <b>147</b> | <b>97</b> | <b>186</b> | <b>186</b> | <b>114</b> | <b>128</b> | <b>186</b> |

**Table S12:** All known variants of Tyrocidines, along with their sequences reported in [1]. The variants which are correctly reconstructed by multiplex sequencing are shown in bold.

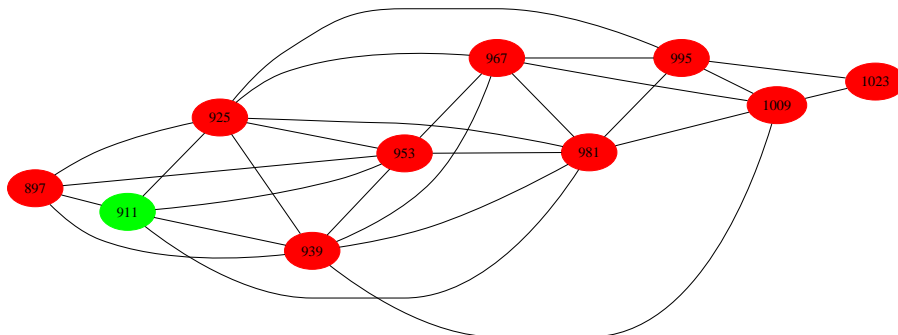

**Fig. S5:** The spectral network of Reginamides after clustering similar spectra, with threshold of 25. Their sequences are dereplicated from Reginamide A in **Table S13** using the **multitag** algorithm.

| Parent Mass | Tag |     |     |     |     |     |     |     |     | Score |
|-------------|-----|-----|-----|-----|-----|-----|-----|-----|-----|-------|
| 897         | 71  | 99  | 113 | 128 | 113 | 147 | 113 | 113 | 113 | 31    |
| 911         | 71  | 113 | 113 | 128 | 113 | 147 | 113 | 113 | 113 | 31    |
| 925         | 71  | 113 | 113 | 142 | 113 | 147 | 113 | 113 | 113 | 25    |
| 939         | 71  | 113 | 113 | 156 | 113 | 147 | 113 | 113 | 113 | 31    |
| 953         | 71  | 113 | 113 | 170 | 113 | 147 | 113 | 113 | 113 | 29    |
| 967         | 71  | 113 | 113 | 184 | 113 | 147 | 113 | 113 | 113 | 28    |
| 981         | 113 | 85  | 113 | 184 | 113 | 147 | 113 | 113 | 113 | 28    |
| 995         | 71  | 113 | 113 | 212 | 113 | 147 | 113 | 113 | 113 | 24    |
| 1009        | 113 | 113 | 113 | 184 | 113 | 147 | 113 | 113 | 113 | 26    |
| 1023        | 71  | 113 | 113 | 240 | 113 | 147 | 113 | 113 | 113 | 20    |

**Table S13:** Dereplication results of Reginamide variants represented by the spectral network in **Figure S5** from Reginamide A, using **multitag** algorithm.

of residues.

### **Text S5. Accurate reconstruction of amino acid masses.**

Fractional parts of amino acid masses in the peptide sequence are reconstructed using the derived integer masses and high resolution spectra (when available).

Let  $m_i$ ,  $1 \leq i \leq k$ , be the (derived) integer amino acid masses and  $x_i$ ,  $1 \leq i \leq k$ , be the (unknown) fractional parts of amino acid masses. We represent each mass in the experimental spectrum as  $s_j + y_j$  ( $1 \leq j \leq N$ ), where  $s_j$  and  $y_j$  represent integer and fractional parts of the masses, respectively. Our goal is to reconstruct  $x_i$ 's from  $m_i$ 's,  $s_j$ 's and  $y_j$ 's.

Corresponding to each match between theoretical and experimental spectrum,  $\sum_{i_1}^{i_2} m_i = s_j$ , we consider an equation  $\sum_{i_1}^{i_2} x_i = y_j$  on fractional parts of amino acid masses. The number of equations is equal to number of matches, and the number of unknowns is equal to the number of amino acids in the peptide sequence. The system of equations is usually over-determined (the number of matches is greater than the number of amino acids in the peptide sequence). Usually, an overdetermined system of equations is inconsistent, and can not be solved exactly. We find the solution of this system that gives the minimum sum square error.

**Table S14** shows high resolution estimation of masses of **Reginamide A**, and Reginamide variant with integer masses 939 and 953, which are obtained using high resolution spectra. In case of Reginamide A, we also utilize the value of parent mass given by high resolution Orbitrap ESI-MS (912.6282  $[M + H]^+$ ). **Table S14** shows the estimated mass of each amino acid, its estimated elemental composition, and the difference between the estimated mass and the mass of an amino acid with the derived elemental composition.

### **Text S6. NMR Analysis of Reginamide A.**

In order to independently validate the derived sequence of Reginamide, we conducted NMR analysis. Reginamide A, obtained as white powder, has the molecular formula  $C_{48}H_{81}N_9O_8$  from the analysis by high resolution ESI-MS (Orbitrap MS with  $m/z$  912.6282  $[M + H]^+$ , with 0.4 ppm error). In the  $^{13}C$  NMR spectrum, eight amide carbonyl carbons were observed, consistent with the 8-mer cyclic peptide that was predicted from multiplex sequencing using mass spectrometry. In addition, eight broad NH signals and eight  $H\alpha$  signals of amino acids were observed in  $^1H$  NMR spectrum, which indicated Reginamide A is a peptide consisting of eight amino acid residues. The amino acid compositions of Reginamide A, deduced from 1D and 2D TOCSY and COSY NMR spectra (in  $CD_3OD/302K$  and  $C_5D_5N/320K$ ) revealed that Reginamide A is formed by one Leu, four Ile, one Phe, one Lys, and one Ala, also in agreement with masses predicted from multiplex sequencing.

Several deuterated solvent have been applied on Reginamide A but none is suitable for collecting both HMBC and ROESY at the same time.  $CD_3OD$  provided the highest quality NMR spectra and the spin-spin splitting or chemical shift of NH and  $H\alpha$  were annotated. However, the fast hydrogen deuterium exchange in  $CD_3OD$  results in the loss of NH signals and their relative correlations in 2D spectrum and therefore we were not able to obtain all the correlations. Nonetheless, the HMBC spectrum (**Figure S6**, in  $CD_3OD/302K$ ) displayed some important  $^3J$  correlations between amide carbonyl carbons and neighboring  $H\alpha$  protons ( $\delta_H$  4.19/ $\delta_{C=O}$  176.0;  $\delta_H$  4.37/ $\delta_{C=O}$  174.0;  $\delta_H$  4.61/ $\delta_{C=O}$  172.3), enabling the partial sequence  $Ile^4$ -Phe-Leu-Ile $^1$ , in agreement with the algorithmically predicted sequence. Subsequently Reginamide A was dissolved in  $C_5D_5N$  to obtain a ROESY spectrum so that

all amide NH signals can be observed. NMR temperature was optimized as 320 K to collect ROE correlations with mixing time 400ms. Two partial sequences,  $Ile^4$ -Phe-Leu and

|                       |            |               |               |                   |               |            |               |               |
|-----------------------|------------|---------------|---------------|-------------------|---------------|------------|---------------|---------------|
| Reginamide A          |            |               |               |                   |               |            |               |               |
| Estimated Mass (Da)   | 71.03729   | 113.08406     | 113.08405     | 128.09500         | 113.08404     | 147.06849  | 113.08397     | 113.08402     |
| Estimated Composition | $C_3H_5NO$ | $C_6H_{11}NO$ | $C_6H_{11}NO$ | $C_6H_{12}N_2O$   | $C_6H_{11}NO$ | $C_9H_9NO$ | $C_6H_{11}NO$ | $C_6H_{11}NO$ |
| Amino Acid            | Ala        | Ile           | Ile           | Lys               | Ile           | Phe        | Leu           | Ile           |
| Composition Mass (Da) | 71.03711   | 113.08406     | 113.08406     | 128.09496         | 113.08406     | 147.06841  | 113.08406     | 113.08406     |
| Mass Error (Da)       | 0.00018    | 0.00000       | -0.00001      | 0.00004           | -0.00002      | 0.00008    | -0.00009      | -0.00004      |
| Reginamide 939        |            |               |               |                   |               |            |               |               |
| Estimated Mass (Da)   | 71.03724   | 113.08442     | 113.08438     | 156.09046         | 113.08427     | 147.06902  | 113.08442     | 113.08452     |
| Estimated Composition | $C_3H_5NO$ | $C_6H_{11}NO$ | $C_6H_{11}NO$ | $C_7H_{12}N_2O_2$ | $C_6H_{11}NO$ | $C_9H_9NO$ | $C_6H_{11}NO$ | $C_6H_{11}NO$ |
| Amino Acid            | Ala        | Ile           | Ile           | non-standard      | Ile           | Phe        | Leu           | Ile           |
| Composition Mass (Da) | 71.03711   | 113.08406     | 113.08406     | 156.08980         | 113.08406     | 147.06841  | 113.08406     | 113.08406     |
| Mass Error (Da)       | 0.00013    | 0.00036       | 0.00032       | 0.00066           | 0.00021       | 0.00061    | 0.00036       | 0.00046       |
| Reginamide 953        |            |               |               |                   |               |            |               |               |
| Estimated Mass (Da)   | 71.03695   | 113.08461     | 113.08444     | 170.10551         | 113.08426     | 147.06895  | 113.08397     | 113.08462     |
| Estimated Composition | $C_3H_5NO$ | $C_6H_{11}NO$ | $C_6H_{11}NO$ | $C_8H_{14}N_2O_2$ | $C_6H_{11}NO$ | $C_9H_9NO$ | $C_6H_{11}NO$ | $C_6H_{11}NO$ |
| Amino Acid            | Ala        | Ile           | Ile           | non-standard      | Ile           | Phe        | Leu           | Ile           |
| Composition Mass (Da) | 71.03711   | 113.08406     | 113.08406     | 170.10643         | 113.08406     | 147.06841  | 113.08457     | 113.08406     |
| Mass Error (Da)       | -0.00016   | 0.00055       | 0.00038       | -0.00092          | 0.00020       | 0.00054    | -0.00060      | 0.00056       |
| Reginamide 897        |            |               |               |                   |               |            |               |               |
| Estimated Mass (Da)   | 71.03699   | 99.06911      | 113.08412     | 128.09495         | 113.08459     | 147.06835  | 113.08455     | 113.08427     |
| Estimated Composition | $C_3H_5NO$ | $C_5H_9NO$    | $C_6H_{11}NO$ | $C_6H_{12}N_2O$   | $C_6H_{11}NO$ | $C_9H_9NO$ | $C_6H_{11}NO$ | $C_6H_{11}NO$ |
| Amino Acid            | Ala        | Val           | Ile           | Lys               | Ile           | Phe        | Leu           | Ile           |
| Composition Mass (Da) | 71.03711   | 99.06840      | 113.08406     | 128.09496         | 113.08406     | 147.06841  | 113.08406     | 113.08406     |
| Mass Error (Da)       | -0.00012   | 0.00071       | 0.00006       | 0.00001           | 0.00053       | -0.00006   | 0.00049       | -0.00021      |

**Table S 14:** High resolution mass of residues of Reginamide A and Reginamides with precursor masses 939, 953 and 897. The closest elemental composition to each estimated mass is also shown. The elemental composition is calculated using the Elcomp software (<http://library.med.utah.edu/masspec/elcomp.htm>), by setting the tolerance to 0.001, and maximum number of Carbon, Hydrogen, Nitrogen and Oxygen atoms to twenty. In all the cases, software returned a unique composition. The non-standard elemental compositions  $C_7H_{12}N_2O_2 + H_2O$  and  $C_8H_{14}N_2O_2 + H_2O$  match the compositions of amino acids Acetyl-Ornithine and Acetyl-Lysine, correspondingly (the only compositions in PDBeChem matching these elemental compositions). For Reginamide A and Reginamide 897, we also have calculated  $[M + H]^+$  of 912.6282 and 898.6149 respectively, which matches our results here with error of 0.4 and 2.8 ppm respectively.

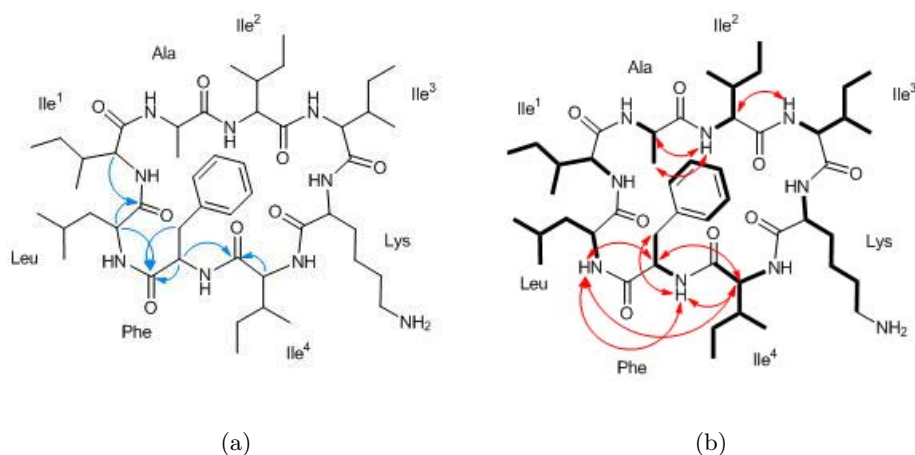

**Fig. S6:** Key 2D NMR correlations of Reginamide A. Blue is  $^1\text{H} - ^{13}\text{C}$  HMBC correlation (left, observed in  $\text{CD}_3\text{OD}$  302 K); red is  $^1\text{H} - ^1\text{H}$  ROESY correlation (right, observed in  $\text{C}_5\text{D}_5\text{N}$  320 K); black bold line is  $^1\text{H} - ^1\text{H}$  TOCSY correlation (right, observed in  $\text{C}_5\text{D}_5\text{N}$  320 K)

$\text{Ala-Ile}^2\text{-Ile}^3$ , were confirmed by strong inter-residues  $\text{H}\alpha/\text{NH}$  ROE correlations in agreement with multiplex sequencing analysis. These data, together with multiplex sequencing results indicate that Reginamide A is cyclic- $\text{Ala-Ile}^2\text{-Ile}^3\text{-Lys-Ile}^4\text{-Phe-Leu-Ile}^1$ . Based on the mass spectrometry analysis it is anticipated (based on the 14 Da shifts) that the lysine is the residue that is modified or preferentially substituted with a alkane-chain functionality.

**Table S15** show  $^1\text{H}$  (600 MHz) and  $^{13}\text{C}$  (125 MHz) NMR data of Reginamide A. ( $\text{CD}_3\text{OD}$ , 302 K). Asterisks means exchangeable. **Table S16** shows  $^1\text{H}$  (600 MHz) NMR data of Reginamide A ( $\text{C}_5\text{D}_5\text{N}$ , 320 K). Additional NMR data are shown in **Figures S7-S20**.



|                        | $\delta_H$                     | $\delta_C$ |                        | $\delta_H$                           | $\delta_C$ |
|------------------------|--------------------------------|------------|------------------------|--------------------------------------|------------|
| <b>Ile<sup>1</sup></b> |                                |            | <b>Lys</b>             |                                      |            |
| <i>NH</i>              | 6.89, <i>brs</i> *             |            | <i>NH</i>              | 7.50, <i>brs</i>                     |            |
| $\alpha$               | 4.19, <i>m</i>                 | 59.7       | $\alpha$               | 4.48, <i>brs</i>                     | 53.3       |
| $\beta$                | 1.30, <i>m</i>                 | 26.9       | $\beta$                | 1.65, <i>m</i>                       | 32.5       |
|                        | 1.37, <i>m</i>                 |            | $\beta$                | 1.73, <i>m</i>                       |            |
| $\gamma$               | 0.97, <i>m</i>                 | 12.1       | $\gamma$               | 1.30, <i>m</i>                       | 30.8       |
|                        | 2.02, <i>m</i>                 | 37.1       | $\gamma$               | 1.52, <i>m</i>                       | 27.6       |
| $\delta$               | 0.97, <i>m</i>                 | 16.1       | $\gamma$               | 1.60, <i>m</i>                       |            |
| <i>C = O</i>           |                                | 174.1      | $\epsilon$             | 2.94, <i>m</i>                       | 40.8       |
|                        |                                |            | <i>C = O</i>           |                                      | 174.7      |
| <b>Ala</b>             |                                |            | <b>Ile<sup>4</sup></b> |                                      |            |
| <i>NH</i>              | 7.74, <i>d</i> , $J = 4.2Hz$   |            | <i>NH</i>              | 8.33, <i>d</i> , $J = 5.9Hz^*$       |            |
| $\alpha$               | 4.32, <i>brt</i> , $J = 5.9Hz$ | 50.1       | $\alpha$               | 4.19, <i>m</i>                       | 60.2       |
| $\beta$                | 1.4, <i>d</i> , $J = 6.8Hz$    | 19.3       | $\beta$                | 1.30, <i>m</i>                       | 27.3       |
| <i>C = O</i>           |                                | 175.1      |                        | 1.37, <i>m</i>                       |            |
|                        |                                |            | $\gamma$               | 0.97, <i>m</i>                       | 11.9       |
| <b>Ile<sup>2</sup></b> |                                |            |                        | 2.02, <i>m</i>                       | 37.2       |
| <i>NH</i>              | 8.45, <i>brs</i>               |            | $\delta$               | 0.97, <i>m</i>                       | 15.6       |
| $\alpha$               | 4.08, <i>d</i> , $J = 10.3Hz$  | 60.3       | <i>C = O</i>           |                                      | 172.3      |
| $\beta$                | 1.28, 1.67                     | 26.2       |                        |                                      |            |
|                        |                                |            | <b>Phe</b>             |                                      |            |
| $\gamma$               | 0.95, <i>m</i>                 | 10.7       | <i>NH</i>              | 8.51, <i>d</i> , $J = 7.2Hz$         |            |
|                        | 1.88, <i>m</i>                 | 36         | $\alpha$               | 4.61, <i>m</i>                       | 56.8       |
| $\delta$               | 0.97, <i>m</i>                 | 15.4       | $\beta$                | 2.76, <i>dd</i> , $J = 13.7, 12.7Hz$ | 37.6       |
|                        |                                |            | <i>Ph</i>              | 7.23, <i>m</i>                       | 127.9      |
| <b>Ile<sup>3</sup></b> |                                |            |                        | 7.23, <i>m</i>                       | 127.9      |
| <i>NH</i>              | 8.11, <i>brs</i>               |            |                        | 7.23, <i>m</i>                       | 129.6      |
| $\alpha$               | 3.78, <i>d</i> , $J = 7.7Hz$   | 60.8       |                        | 7.3, <i>m</i>                        | 130.1      |
| $\beta$                | 0.97, <i>m</i>                 | 26.5       | <i>C = O</i>           |                                      | 138.9      |
|                        | 1.45, <i>m</i>                 |            |                        |                                      | 174.0      |
| $\gamma$               | 0.49, <i>d</i> , $J = 6.8Hz$   | 15.3       | <b>Leu</b>             |                                      |            |
|                        | 1.6, <i>m</i>                  | 36.6       | <i>NH</i>              | 8.05, <i>d</i> , $J = 7.0Hz$         |            |
| $\delta$               | 0.81, <i>t</i> , $J = 7.3Hz$   | 11.3       | $\alpha$               | 4.37, <i>brd</i> , $J = 7.6Hz$       | 54.6       |
| <i>C = O</i>           |                                | 174.5      | $\beta$                | 1.65, <i>m</i>                       | 25.9       |
|                        |                                |            |                        | 1.83, <i>m</i>                       |            |
|                        |                                |            | $\gamma$               | 2.19, <i>m</i>                       | 40.9       |
|                        |                                |            | $\delta$               | 0.98, <i>m</i>                       | 21.6       |
|                        |                                |            |                        | 1.05, <i>d</i> , $J = 6.5Hz$         | 23.9       |
|                        |                                |            | <i>C = O</i>           |                                      | 176.0      |

**Table S15:**  $^1H$  (600 MHz) and  $^{13}C$  (125 MHz) NMR data of Reginamide A. ( $CD_3OD$ , 302 K). Asterisk means exchangeable.

|                        | $\delta_H$                         |                        | $\delta_H$                                 |
|------------------------|------------------------------------|------------------------|--------------------------------------------|
| <b>Ile<sup>1</sup></b> |                                    | <b>Lys</b>             |                                            |
| NH                     | 7.37, <i>brs</i>                   | NH                     | 9.38, <i>brs</i> *                         |
| $\alpha$               | 4.83, <i>m</i>                     | $\alpha$               | 5.06, <i>m</i>                             |
| $\beta$                | 1.70, <i>m</i>                     | $\beta$                | 2.10, <i>m</i>                             |
| $\gamma$               | 1.19, <i>d</i> , $J = 6.9Hz$       | $\gamma$               | 1.47, <i>m</i>                             |
|                        | 2.45, <i>m</i>                     | $\delta$               | 1.69, <i>m</i>                             |
| $\delta$               | 0.98, <i>t</i> , $J = 7.2Hz$       | $\epsilon$             | 3.10, <i>m</i>                             |
| <b>Ala</b>             |                                    | <b>Ile<sup>4</sup></b> |                                            |
| NH                     | 8.31, <i>brs</i>                   | NH                     | 7.47, <i>brs</i> *                         |
| $\alpha$               | 5.18, <i>q</i> , $J = 6.7Hz$       | $\alpha$               | 4.23, <i>dd</i> , $J = 8.0, 4.5Hz$         |
| $\beta$                | 1.77, <i>d</i> , $J = 6.7Hz$       | $\beta$                | 0.97, <i>m</i>                             |
|                        |                                    |                        | 1.52, <i>m</i>                             |
| <b>Ile<sup>2</sup></b> |                                    | $\gamma$               | 0.67, <i>d</i> , $J = 6.8Hz$               |
| NH                     | 9.74, <i>d</i> , $J = 5.1Hz$       |                        | 1.85, <i>m</i>                             |
| $\alpha$               | 4.45, <i>m</i>                     | $\delta$               | 0.57, <i>t</i> , $J = 6.7Hz$               |
| $\beta$                | 1.33, <i>m</i>                     |                        |                                            |
|                        | 1.69, <i>m</i>                     | <b>Phe</b>             |                                            |
| $\gamma$               | 0.94, <i>d</i> , $J = 6.5Hz$       | NH                     | 9.48, <i>brs</i>                           |
|                        | 2.20, <i>m</i>                     | $\alpha$               | 5.29, <i>ddd</i> , $J = 11.5, 8.0, 3.2Hz$  |
| $\delta$               | 0.70, <i>t</i> , $J = 7.4Hz$       | $\beta$                | 3.11, <i>dd</i> , $J = 14.6, 8.0Hz$        |
|                        |                                    |                        | 3.89, <i>dd</i> , $J = 14.6, 3.2Hz$        |
| <b>Ile<sup>3</sup></b> |                                    | <i>Ph</i>              | 7.22, <i>t</i> , $J = 7.5Hz$               |
| NH                     | 9.20, <i>d</i> , $J = 5.4Hz$       |                        | 7.28, <i>t</i> , $7.5Hz$                   |
| $\alpha$               | 4.70, <i>dd</i> , $J = 5.4, 4.4Hz$ |                        | 7.37, <i>d</i> , $J = 7.5Hz$               |
| $\beta$                | 1.52, <i>m</i>                     |                        |                                            |
|                        | 1.70, <i>m</i>                     | <b>Leu</b>             |                                            |
| $\gamma$               | 1.21, <i>d</i> , $J = 7.1Hz$       | NH                     | 8.60, <i>d</i> , $J = 7.3Hz$               |
|                        | 2.39, <i>m</i>                     | $\alpha$               | 4.99, <i>m</i>                             |
| $\delta$               | 0.91, <i>t</i> , $J = 7.4Hz$       | $\beta$                | 1.98, <i>m</i>                             |
|                        |                                    | $\gamma$               | 2.26, <i>ddd</i> , $J = 13.8, 10.0, 3.7Hz$ |
|                        |                                    |                        | 2.71, <i>m</i>                             |
|                        |                                    | $\delta$               | 0.94, <i>d</i> , $J = 6.7Hz$               |
|                        |                                    |                        | 1.01, <i>d</i> , $J = 6.7Hz$               |

**Table S16:**  $^1H$  (600 MHz) NMR data of Reginamide A. ( $C_5D_5N$ , 320 K). Asterisk means exchangeable.

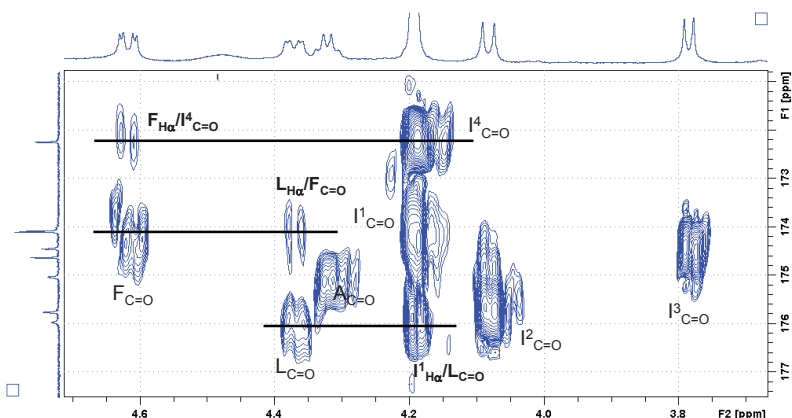

**Fig. S7:** Key HMBC correlations (600MHz,  $CD_3OD$ , 302 K,  $^{2,3}J = 7$  Hz) of Reginamide A

### Text S7. Parameter Setting.

The proposed method requires setting few parameters, such as the peptides length  $k$ , and the threshold on  $\delta(S, S')$  for accepting an edge in the spectrum graph. Choice of  $\delta(S, S')$  can always be avoided by using adaptive approach explained in **Text S2**. Setting peptide length can be achieved by the following procedure. By starting from a small peptide length, by each unit of increase in peptide length the optimal peptide score jumps significantly. However, after taking more steps, the score remains constant. Optimal peptide length should be chosen at this phase transition.

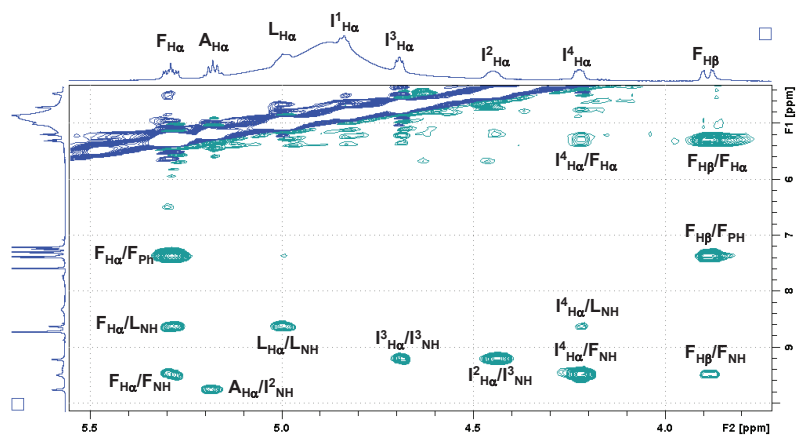

Fig. S8: Key ROSEY correlations (600MHz,  $C_5D_5N$ , 320 K, mixing time 400ms) of Reginamide A

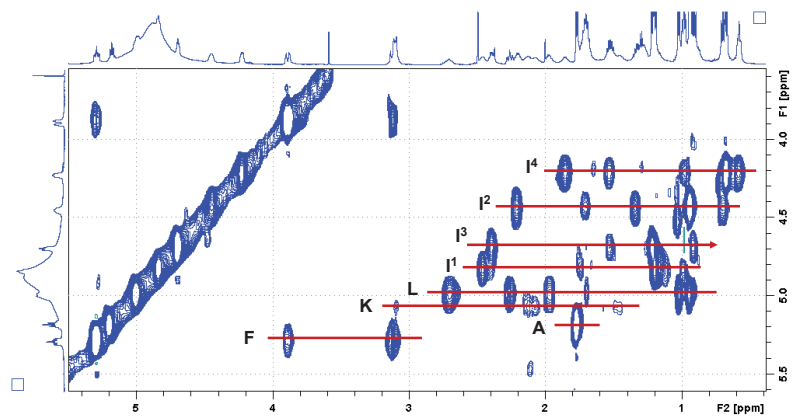

Fig. S9: Key TOCSY correlations (600MHz,  $C_5D_5N$ , 320 K, mixing time 90ms) of Reginamide A

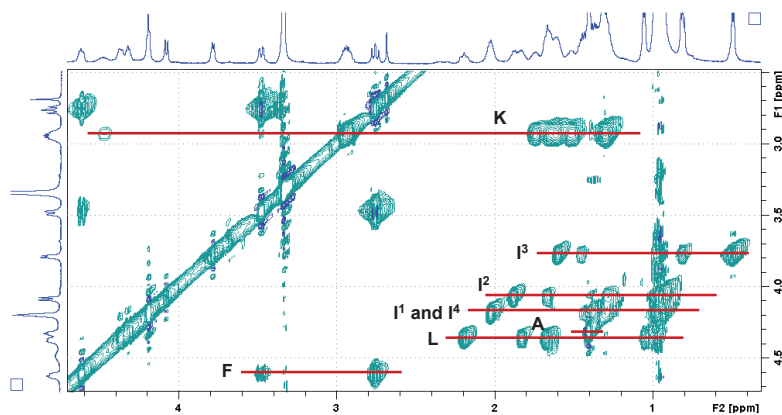

**Fig. S10:** Key TOCSY correlations (600MHz,  $CD_3OD$ , 302 K, mixing time 90 ms) of Reginamide A

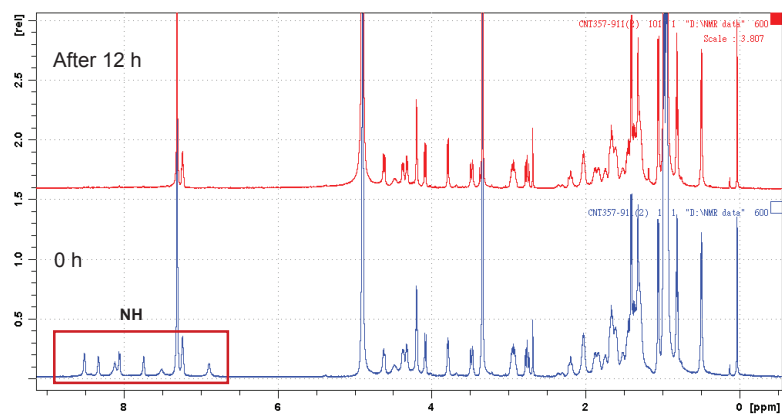

**Fig. S11:**  $^1H$  spectra (600MHz,  $CD_3OD$ , 302 K) of Reginamide A

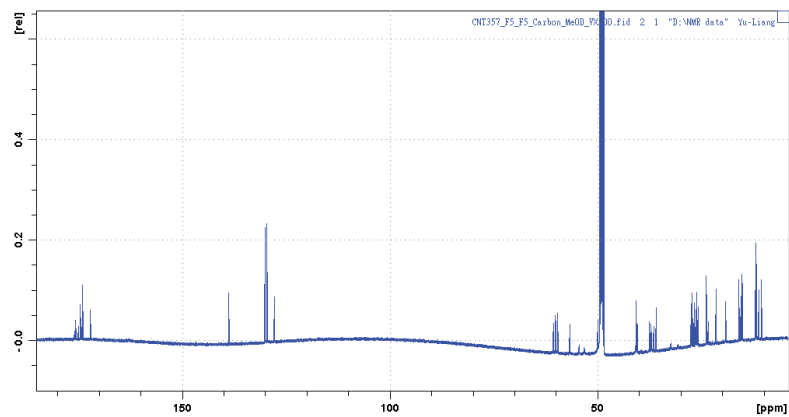

Fig. S12:  $^{13}\text{C}$  NMR spectra (125MHz,  $\text{CD}_3\text{OD}$ , 302 K) of Reginamide A

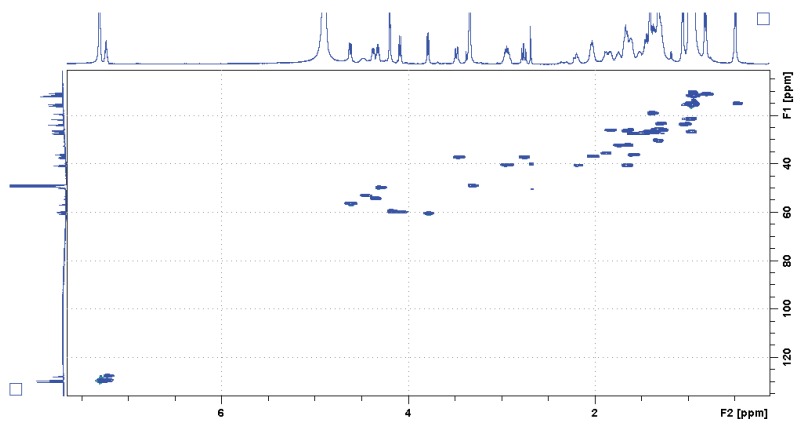

Fig. S13: HSQC spectrum (600MHz,  $\text{CD}_3\text{OD}$ , 302 K,  $^1J = 145$  Hz) of Reginamide A

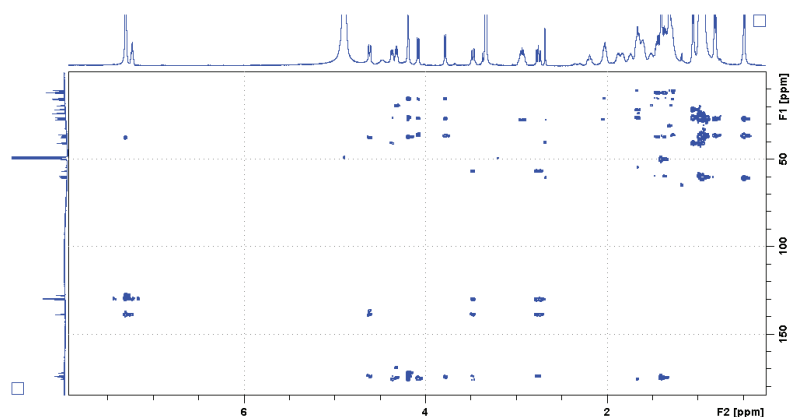

**Fig. S14:** HMBC spectrum (600MHz,  $CD_3OD$ , 302 K,  $^{2,3}J = 7$  Hz) of Reginamide A

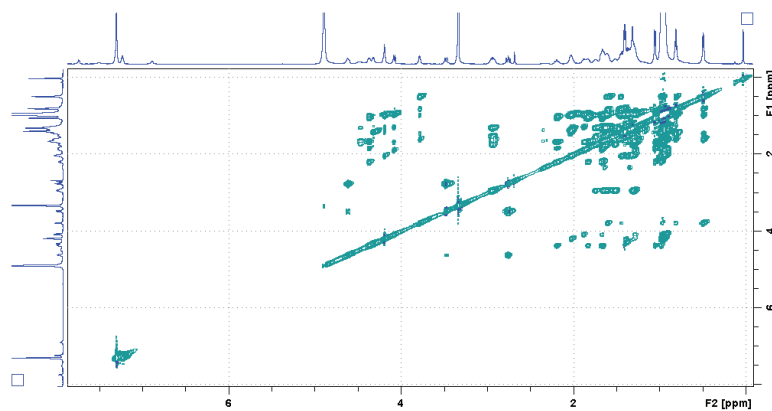

**Fig. S15:** TOCSY spectrum (600MHz,  $CD_3OD$ , 302 K, mixing time 90 ms) of Reginamide A

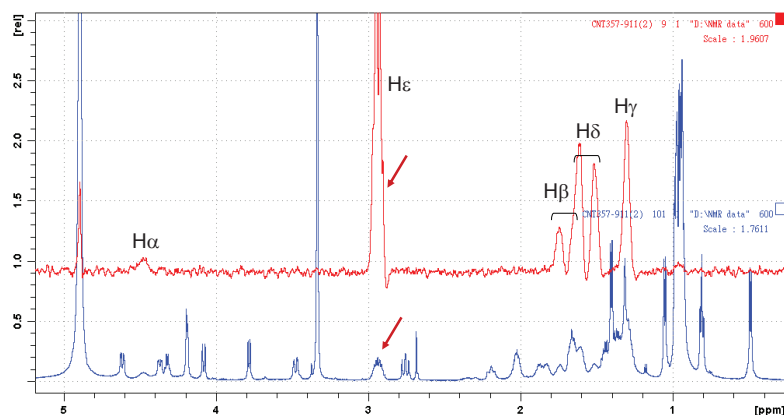

**Fig. S16:** 1D TOCSY spectrum (red) and  $^1\text{H}$  NMR spectrum (blue) of Reginamide A.  $H_\epsilon$  was irradiated by 90 ms mixing time



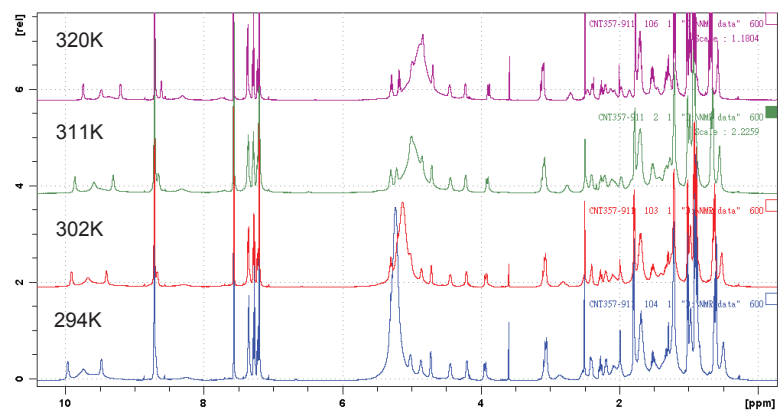

(a)

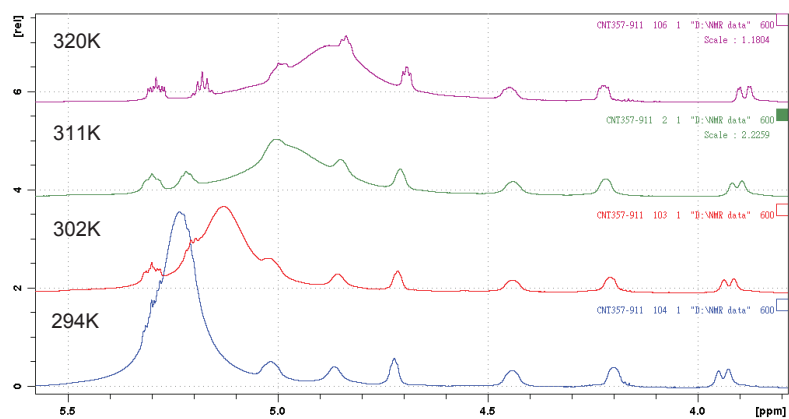

(b)

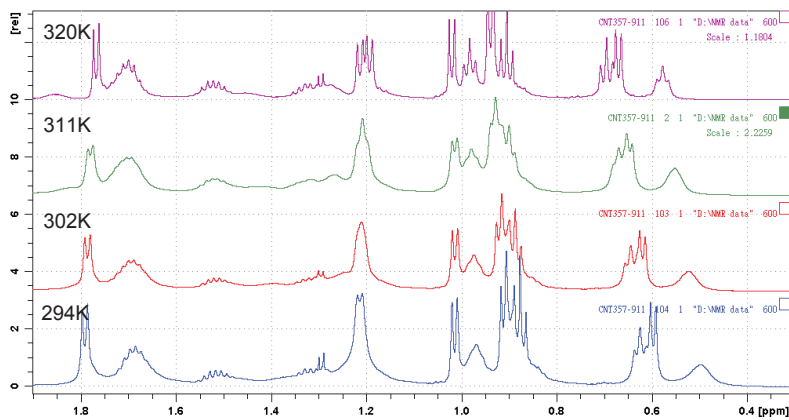

(c)

Fig. S17:  $^1\text{H}$  NMR spectra (600MHz,  $\text{C}_5\text{D}_5\text{N}$ ) of Reginamide A at different temperatures.

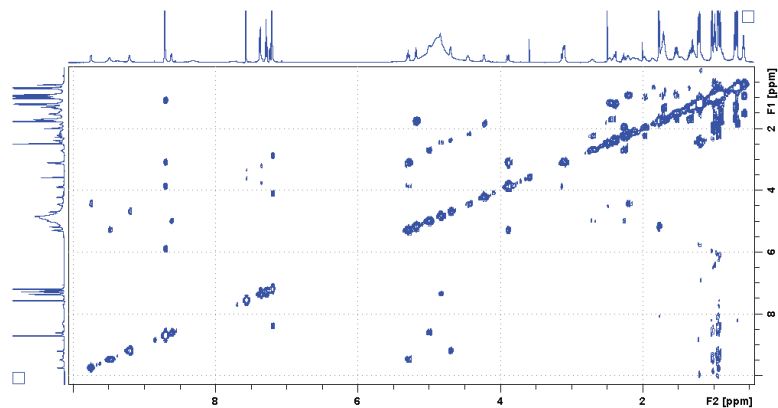

**Fig. S18:** COSY spectrum (600MHz,  $C_5D_5N$ , 320 K) of Reginamide A

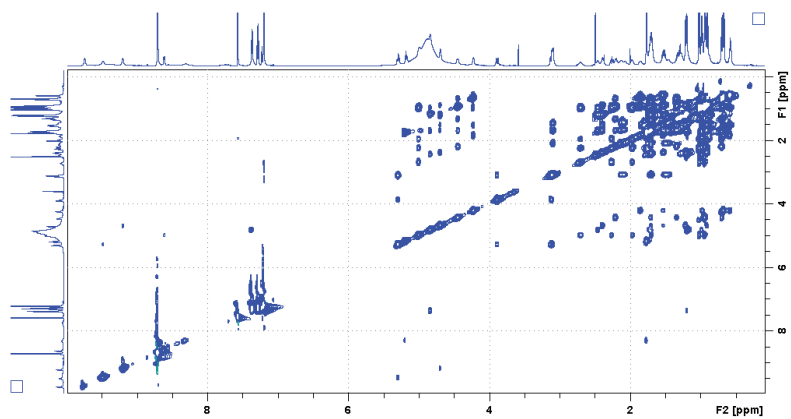

**Fig. S19:** TOCSY spectrum (600MHz,  $C_5D_5N$ , 320 K, mixing time 90ms) of Reginamide A

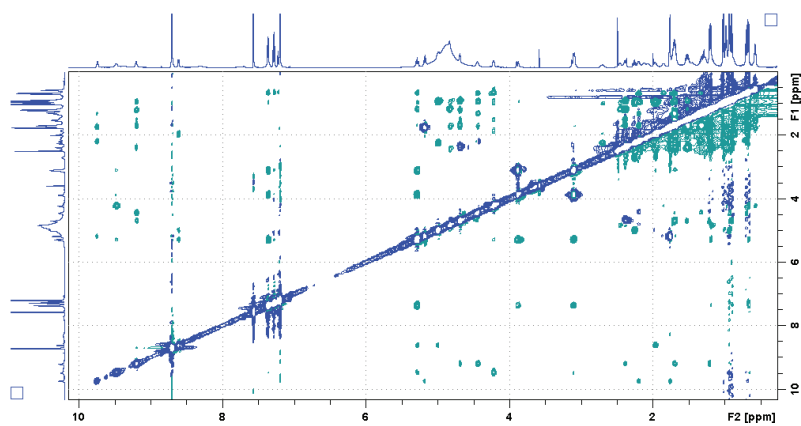

**Fig. S20:** ROSEY spectrum (600MHz,  $C_5D_5N$ , 320 K, mixing time 400ms) of Regimamide A
